# Supplementary material for: Semi-Fluorinated Di and Triblock Copolymer Nano-Objects Prepared via RAFT Alcoholic Dispersion Polymerization (PISA)
Source: MDPI journal article supplement (doi:10.3390/polym13152502), 2021-07-29

## Supporting Information

# Semi-fluorinated di and triblock copolymer nano-objects prepared via RAFT alcoholic dispersion polymerization (PISA)

Gregoire Desnos <sup>1</sup>, Adrien Rubio <sup>1</sup>, Chaimaa Gomri <sup>1</sup>, Mathias Gravelle <sup>1</sup>, Vincent Ladmiral <sup>2</sup> and Mona Semsarilar <sup>1,\*</sup>

<sup>1</sup> IEM, Univ Montpellier, CNRS, ENSCM, Montpellier, France.

<sup>2</sup> ICGM, Univ Montpellier, CNRS, ENSCM, Montpellier, France.

Table S1: Summary of assemblies focusing on HCFDDMA

| N° | Composition                                                     | Target DP | Conversion % | Theo. DP, x | Size DLS (nm) | Size TEM (nm) |
|----|-----------------------------------------------------------------|-----------|--------------|-------------|---------------|---------------|
| 1  | PDMA <sub>58</sub> -PBzMA <sub>x</sub>                          | 200       | 99           | 198         | 70            | 46            |
| 2  | PDMA <sub>58</sub> -PBzMA <sub>198</sub> -PHCFDDMA <sub>x</sub> | 20        | 95           | 19          | 172           | 60            |
| 3  | PDMA <sub>58</sub> -PBzMA <sub>198</sub> -PHCFDDMA <sub>x</sub> | 50        | NA           | NA          | NA            | NA            |

Table S2: Summary of the different copolymers synthesized and their dimensions

| N° | Composition                                                   | Target DP | Conversion % | Theo. DP, x | Size DLS (nm) | Size TEM (nm) | Morphology |
|----|---------------------------------------------------------------|-----------|--------------|-------------|---------------|---------------|------------|
| 1  | PDMA <sub>58</sub> -PBzMA <sub>x</sub>                        | 70        | 99           | 69          | 40            | 23            | Sphere     |
| 2  |                                                               | 200       | 97           | 194         | 75            | 46            | Sphere     |
| 3  | PDMA <sub>58</sub> -PBzMA <sub>69</sub> -PTDFOA <sub>x</sub>  | 50        | 95           | 48          | 58            | 26            | Sphere     |
| 4  |                                                               | 100       | 91           | 91          | 95            | 49            | Sphere     |
| 5  |                                                               | 150       | 96           | 144         | 160           | 54            | Sphere     |
| 6  | PDMA <sub>58</sub> -PBzMA <sub>194</sub> -PTDFOA <sub>x</sub> | 50        | 88           | 44          | 70            | 52            | Sphere     |
| 7  |                                                               | 100       | 83           | 83          | 90            | 61            | Sphere     |
| 8  |                                                               | 150       | 79           | 120         | 170           | 69            | Sphere     |

Table S3: Summary of selected copolymers molecular weights and dipersities obtained from THF SEC calibrated with PS standards.

| N° | Composition                                                     | <i>M<sub>n</sub></i> (g/mol) | <i>M<sub>w</sub></i> (g/mol) | Đ    |
|----|-----------------------------------------------------------------|------------------------------|------------------------------|------|
| 1  | PDMA <sub>39</sub> -PBzMA <sub>198</sub> -PHFBMA <sub>96</sub>  | 37000                        | 45000                        | 1.22 |
| 2  | PDMA <sub>39</sub> -PBzMA <sub>198</sub> -PHFBMA <sub>144</sub> | 59000                        | 85000                        | 1.45 |
| 3  | PDMA <sub>39</sub> -PHFBMA <sub>99</sub> -PBzMA <sub>198</sub>  | 98000                        | 126000                       | 1.28 |
| 4  | PDMA <sub>39</sub> -PHFBMA <sub>149</sub> -PBzMA <sub>198</sub> | 100000                       | 123000                       | 1.23 |
| 5  | PDMA <sub>58</sub> -PBzMA <sub>194</sub> -PTDFOA <sub>83</sub>  | 64000                        | 79000                        | 1.23 |
| 6  | PDMA <sub>58</sub> -PBzMA <sub>194</sub> -PTDFOA <sub>120</sub> | 42000                        | 52000                        | 1.25 |

**Figure S1.**  $^1\text{H}$  NMR spectra of unpurified (a) and purified (b) PDMA macro-CTA. For more details please refer to entry 1 in Table 1.

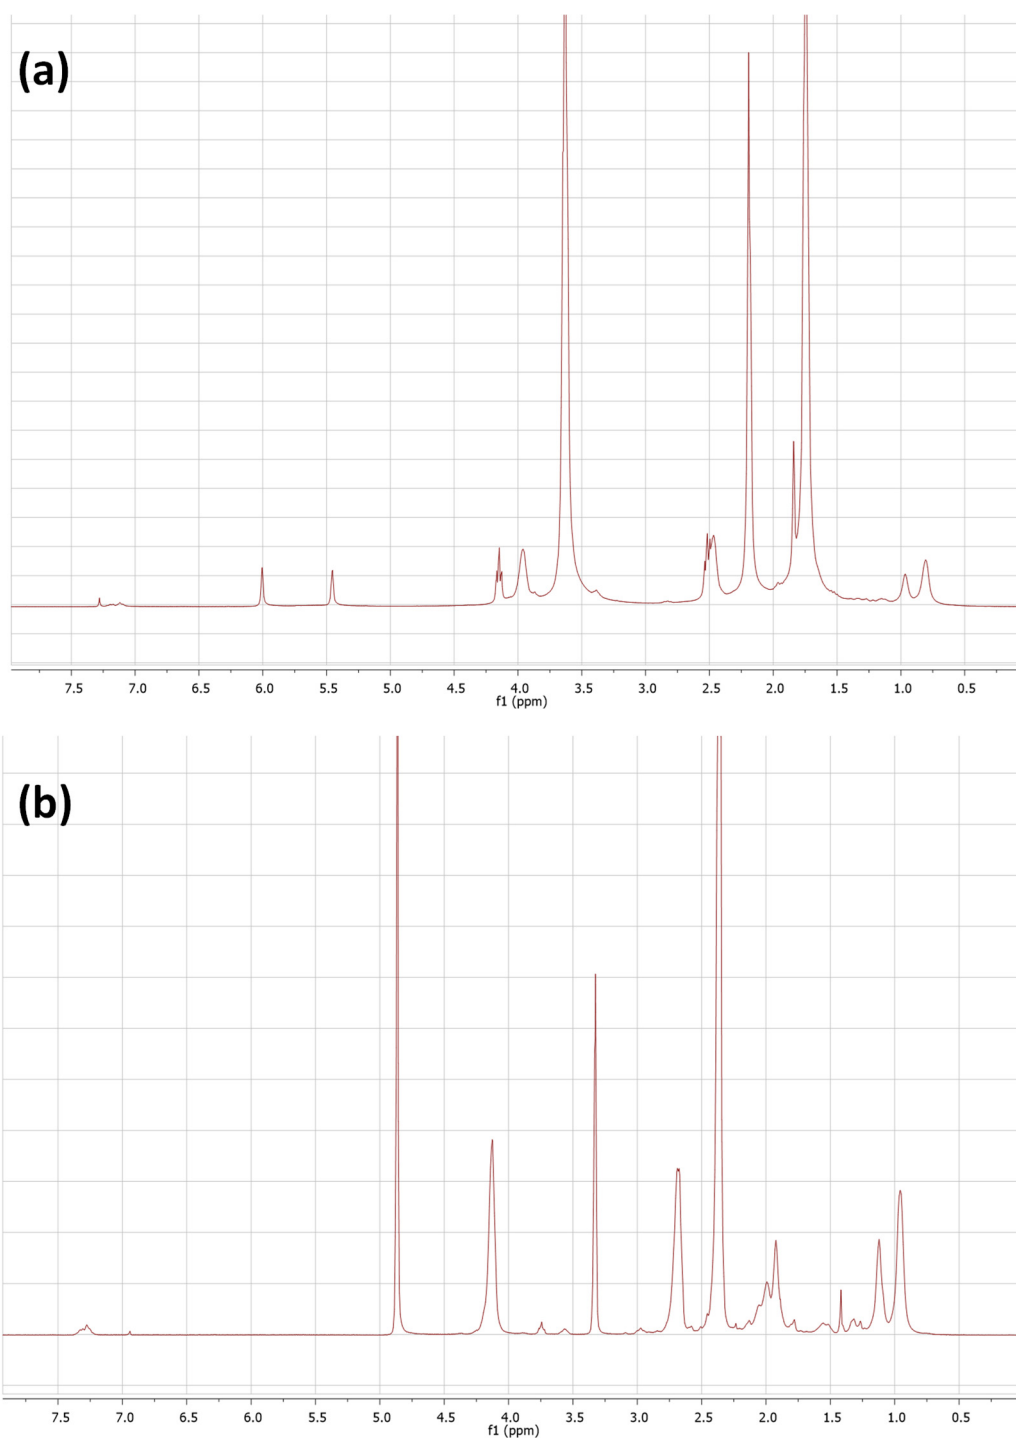

Supplement: s1 [file s1]
